# Supplementary material
Source: PubMed Central journal article supplement (PMC3910567)
Supplement: 1312455111_pnas.201312455SI.pdf [file 1312455111_pnas.201312455SI.pdf]

# Supporting Information

Li et al. 10.1073/pnas.1312455111

## SI Materials and Methods

**Animals.** Long-Evans rats [postnatal day (P)19–P36; both sexes] were used.

**Whisker Deprivation.** D row (D1–D6) and  $\gamma$ -whiskers on the right side were trimmed to the skin every other day under isoflurane anesthesia. Whiskers were allowed to regrow for 3 d before in vivo recording, and whisker deflection was delivered through the regrown stub. For 1 d of deprivation, trimmed whiskers were glued back to the stub for recording. Control animals were littermates that underwent anesthesia and handling (sham trimming). For slice physiology experiments, whiskers were plucked instead of trimmed.

**In Vivo Recordings.** Rats were anesthetized with urethane (1.5 g/kg induction, 10% supplemental injections as needed). The skull was thinned over left primary somatosensory cortex for intrinsic signal optical imaging (ISOI). Whisker deflection was delivered by piezos using standardized ramp–hold–return deflections [2°, 4-ms ramp, 62.5 mm/s (550°/s) velocity, 100- or 500-ms hold for single-unit or whole-cell recordings, respectively]. All whiskers (control and deprived rats) were deflected 3 mm from the face. Cortical representations of one D-row whisker and two immediately adjacent C- and E-row whiskers were mapped under red light illumination (630 nm) using a Dalsa 1M60 camera as described previously (1). Response area was defined as the region with >0.015% change in intrinsic signal.

Extracellular recordings were made with tungsten electrodes (3.5 M $\Omega$ ) targeted at the center of mass of a D-whisker ISOI response area. Recordings (0.5- to 8-kHz band pass, 3,000 $\times$  gain, 32-kHz digitization, 12-bit resolution) were made at spontaneously active sites every  $\sim$ 70  $\mu$ m from 168 to 800  $\mu$ m below the pia. Spike sorting was performed offline, and laminar location was inferred from recording depth [layer 2/3 (L2/3): 150–600  $\mu$ m below pia; L4: 600–900  $\mu$ m] (2). Spontaneous firing in a 100-ms prestimulus window was subtracted from whisker-evoked responses. Electrolytic lesions were made in L4 to mark recording sites, which were recovered in cytochrome oxidase-stained tangential sections to determine recording locations relative to barrel boundaries. Sites in septa or inappropriate columns were excluded.

Whisker-evoked local field potentials were recorded with tungsten electrodes (2-kHz low pass, 100 $\times$  gain) at 400 (L2/3) and 800  $\mu$ m (L4) below the pia simultaneously with most single-unit recordings. Current source density analysis was performed in one experiment (Fig. S34), in which whisker-evoked local field potentials were measured with a linear silicon probe (A1x16-3mm-100-413-A16; Neuronexus) positioned in the D1 column with the top recording site at the pia (0- $\mu$ m depth). Frequency-dependent phase shifts caused by analog hardware filters were corrected offline (FPAlign; Plexon Inc.). The current source density was calculated as the second spatial derivative using a finite difference formula and spatially smoothed using a (0.25, 0.5, 0.25) triangle filter (3).

**In Vivo Whole-Cell Recording.** The craniotomy was perfused with Ringer's solution [119 mM NaCl, 26.2 mM NaHCO<sub>3</sub>, 11 mM D-(+)-glucose, 1.3 mM MgSO<sub>4</sub>, 2.5 mM KCl, 1 mM NaH<sub>2</sub>PO<sub>4</sub>, 2.5 mM CaCl<sub>2</sub> bubbled with 95% O<sub>2</sub>/5% CO<sub>2</sub> (vol/vol), pH 7.30, 290 mOsm]. L2/3 neurons (depth = 273–590  $\mu$ m) were patched using standard blind patching techniques (4, 5), with pipettes 20–30° off radial. Internal solution contained cesium and N-(2,6-dimethylphenylcarbamoylmethyl)triethylammonium (QX-314) bromide to block voltage-gated K<sup>+</sup> and Na<sup>+</sup> conductances and

1,2-bis(o-aminophenoxy)ethane-N,N,N',N'-tetraacetic acid (BAPTA) to inhibit Ca<sup>2+</sup> gated conductances (88 mM CsOH, 88 mM D-gluconic acid, 20 mM Hepes, 5 mM tetraethylammonium chloride (TEACl), 2.8 mM NaCl, 0.4 mM EGTA, 0.3 mM Na<sub>3</sub>GTP, 4 mM MgATP, 10 mM Na<sub>2</sub>-phosphocreatine, 5 mM BAPTA, 25 mM QX-314, pH 7.20). Resting potential was measured immediately after break-in. Vhold values were corrected for a 10 mV liquid junction potential. Series resistance (Rseries) and input resistance (Rinput) were measured in each sweep from a double exponential fit to the membrane current transient evoked by a hyperpolarizing voltage step (–5 mV). Rseries was not corrected.

In each cell, the principal whisker (PW) was identified as the whisker that evoked the largest PW-evoked postsynaptic current (wPSC) at –70 mV. The PW matched ISOI map location for 21 of 25 cells in control animals (P23–P36), confirming the accuracy of ISOI targeting. The wPSCs (mean of 12–75 repetitions) were recorded at five holding potentials (–90, –68, –40, 0, and +30 mV) in response to standardized whisker deflections. Cells were accepted for analysis if (i) wPSCs reversed at Vhold  $\geq$  0 mV; (ii) Rseries was <30 M $\Omega$ ; (iii) Rseries, Rinput, and holding current (Ihold) changed <30% during the recording period (0.5–2 h); and (iv) the current–voltage (I–V) relationship at the peak of the wPSC was linear. Recording location was verified histologically for a subset of cells ( $n = 11$ ) by marking the penetration track with ink. All 11 cells were localized to the cortical column corresponding to the PW.

**Estimation of Synaptic Conductance.** Whisker-evoked excitatory synaptic conductance [Gex(t)] and inhibitory synaptic conductance [Gin(t)] were estimated using standard methods (6, 7). First, the total synaptic conductance [Gtotal(t)] and reversal potential [Erev(t)] at each time point t were determined using data from the five holding potentials by linear fit of the equation

$$I_{\text{syn}}(t) = G_{\text{total}}(t) \times (V_{\text{hold}}(t) - E_{\text{rev}}(t)),$$

where  $I_{\text{syn}}(t)$  is the synaptic current measured in response to whisker deflection and  $V_{\text{hold}}(t)$  is the holding potential adjusted for ohmic loss through Rseries. Gtotal excludes resting conductance. Second, Gex(t) and Gin(t) were calculated by the equations (6)

$$G_{\text{in}}(t) = G_{\text{total}}(t) \times (E_{\text{ex}} - E_{\text{rev}}(t)) / (E_{\text{ex}} - E_{\text{in}}) \text{ and}$$

$$G_{\text{ex}}(t) = G_{\text{total}}(t) - G_{\text{in}}(t),$$

where  $E_{\text{ex}}$  and  $E_{\text{in}}$  are the reversal potentials for excitation and inhibition (0 and –68 mV, respectively, as determined in L2/3 pyramidal cells in primary somatosensory slices). Conductances were analyzed in the window of 0–77 ms poststimulus, where I–V curves were most consistently linear. Gex and Gin were constrained to be nonnegative (7).

**Slice Physiology.** Rats were anesthetized with isoflurane, and the brain was quickly removed in cold cutting solution [75 mM sucrose, 85 mM NaCl, 25 mM D-(+)-glucose, 25 mM NaHCO<sub>3</sub>, 4 mM MgSO<sub>4</sub>, 2.5 mM KCl, 1.25 mM NaH<sub>2</sub>PO<sub>4</sub>, 0.5 mM CaCl<sub>2</sub> bubbled with 95% O<sub>2</sub>/5% CO<sub>2</sub> (vol/vol), pH 7.20]. Cortical slices (400  $\mu$ m) were cut from the left hemisphere in the across-row plane (50° to coronal from sagittal, 10° down angle), and therefore each slice contained one barrel from the A–E whisker rows (8, 9). Slices were incubated in oxygenated normal Ringer's solution (119 mM NaCl, 26.2 mM NaHCO<sub>3</sub>, 11 mM D-(+)-glucose,

1.3 mM MgSO<sub>4</sub>, 2.5 mM KCl, 1 mM NaH<sub>2</sub>PO<sub>4</sub>, 2.5 mM CaCl<sub>2</sub>, pH 7.30) for 30 min at 30 °C and 0.5–6 h at room temperature before recording.

Whole-cell recordings were made in normal Ringer's solution from visually identified L2/3 pyramidal neurons in D-barrel columns at 30 °C. Miniature excitatory postsynaptic currents were recorded in voltage clamp using Cs gluconate internal (108 mM D-gluconic acid, 108 mM CsOH, 20 mM Hepes, 5 mM TEACl, 2.8 mM NaCl, 0.3 mM EGTA, 4 mM MgATP, 0.3 mM NaGTP, 5 mM BAPTA, pH 7.20, 290 mOsm). Vhold was –90 mV. Cells were excluded if Vrest was >–55 mV or Rseries was >15 MΩ. At least 200 miniature excitatory postsynaptic currents were required. Passive and spiking properties were measured in current clamp using K gluconate internal (116 mM K gluconate, 20 mM Hepes, 6 mM KCl, 2 mM NaCl, 0.5 mM EGTA, 4 mM MgATP, 0.3 mM NaGTP, 5 mM Na<sub>2</sub>-phosphocreatine, pH 7.25, 290 mOsm). Cells were excluded if Vrest was >–60 mV or Rseries was >15 MΩ. Rseries was compensated for by bridge balance.

Liquid junction potential (10–12 mV) was corrected for all recordings. Rinput was calculated as I–V curve slope for –50, 0, and +50 pA current injections. Ih was measured from Vm sag in response to a –200-pA, 500-ms current injection from Vrest. Sag ratio was quantified as (ΔVm at 480–500 ms)/(ΔVm at 120–140 ms) (Fig. S7D). Curves relating firing rate and injected current were calculated from 500-ms current injections. Rheobase was defined as the minimal current that elicited at least one spike on five consecutive sweeps. Spike threshold was identified as the prespike Vm at which the second derivative exceeded 6 SDs above the baseline before current injection. Spike width is full width at one-half height. Afterhyperpolarization was measured during spike trains (like in Fig. 5C) as spike threshold – (minimum Vm after the spike).

**Statistics.** Numbers are mean ± SE or median (25th, 75th percentile). Conductance values were nonnormally distributed and compared by nonparametric tests. The critical significance value was 0.05.

1. Drew PJ, Feldman DE (2009) Intrinsic signal imaging of deprivation-induced contraction of whisker representations in rat somatosensory cortex. *Cereb Cortex* 19(2):331–348.
2. Li L, et al. (2009) Endocannabinoid signaling is required for development and critical period plasticity of the whisker map in somatosensory cortex. *Neuron* 64(4):537–549.
3. Freeman JA, Nicholson C (1975) Experimental optimization of current source-density technique for anuran cerebellum. *J Neurophysiol* 38(2):369–382.
4. Margrie TW, Brecht M, Sakmann B (2002) In vivo, low-resistance, whole-cell recordings from neurons in the anaesthetized and awake mammalian brain. *Pflugers Arch* 444(4): 491–498.
5. Jacob V, Brasier DJ, Erchova I, Feldman D, Shulz DE (2007) Spike timing-dependent synaptic depression in the in vivo barrel cortex of the rat. *J Neurosci* 27(6):1271–1284.
6. Wehr M, Zador AM (2003) Balanced inhibition underlies tuning and sharpens spike timing in auditory cortex. *Nature* 426(6965):442–446.
7. Monier C, Fournier J, Frégnac Y (2008) In vitro and in vivo measures of evoked excitatory and inhibitory conductance dynamics in sensory cortices. *J Neurosci Methods* 169(2):323–365.
8. Allen CB, Celikel T, Feldman DE (2003) Long-term depression induced by sensory deprivation during cortical map plasticity in vivo. *Nat Neurosci* 6(3):291–299.
9. Finnerty GT, Roberts LS, Connors BW (1999) Sensory experience modifies the short-term dynamics of neocortical synapses. *Nature* 400(6742):367–371.
